# Supplementary material for: A network-based method for identifying prognostic gene modules in lung squamous carcinoma
Source: PubMed Central journal article supplement (PMC4951267; doi:10.18632/oncotarget.7632), 2016-02-23
Supplement: oncotarget-07-18006-s003.pdf [file oncotarget-07-18006-s003.pdf]

# A network-based method for identifying prognostic gene modules in lung squamous carcinoma

## Supplementary Material

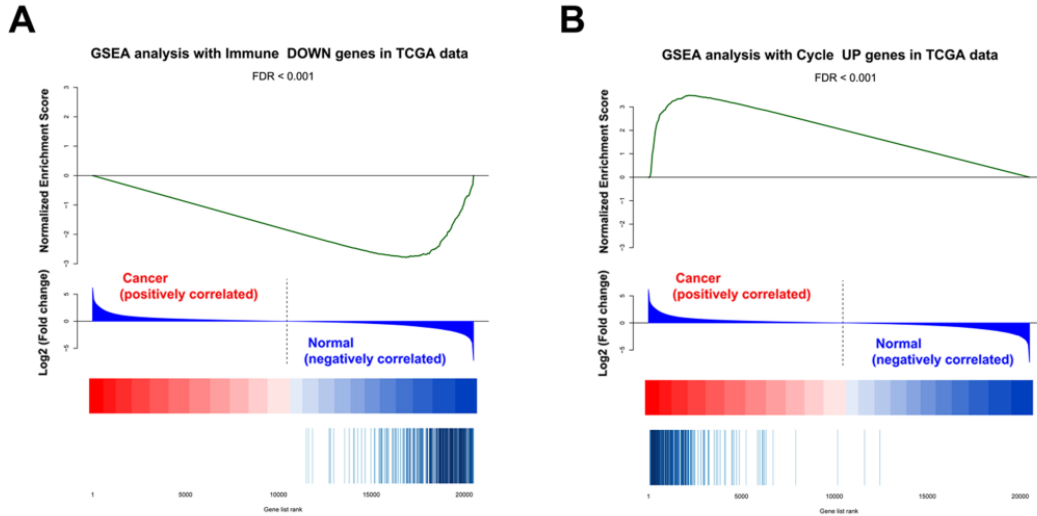

**Supplementary Figure 1:** GSEA analyses with Immune DOWN and Cycle UP genes in TCGA data. (A) Immune DOWN genes were significantly down-regulated in cancer samples in comparison to adjacent normal tissue. (B) Cycle UP genes were significantly up-regulated in cancer samples in comparison to adjacent normal tissue, indicating that these consistent DEGs had consistent differential expression pattern in cancer and adjacent normal tissue.

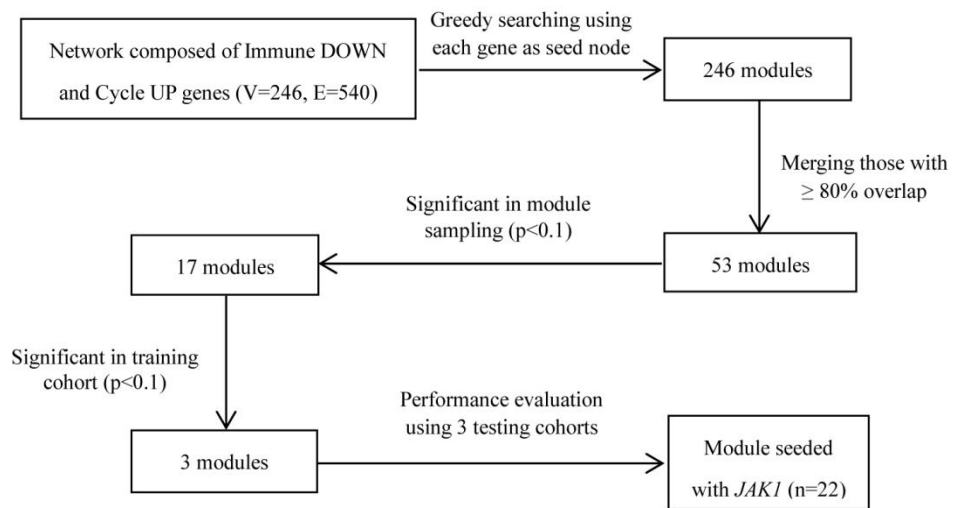

**Supplementary Figure 2:** Schematic of module selection procedures.

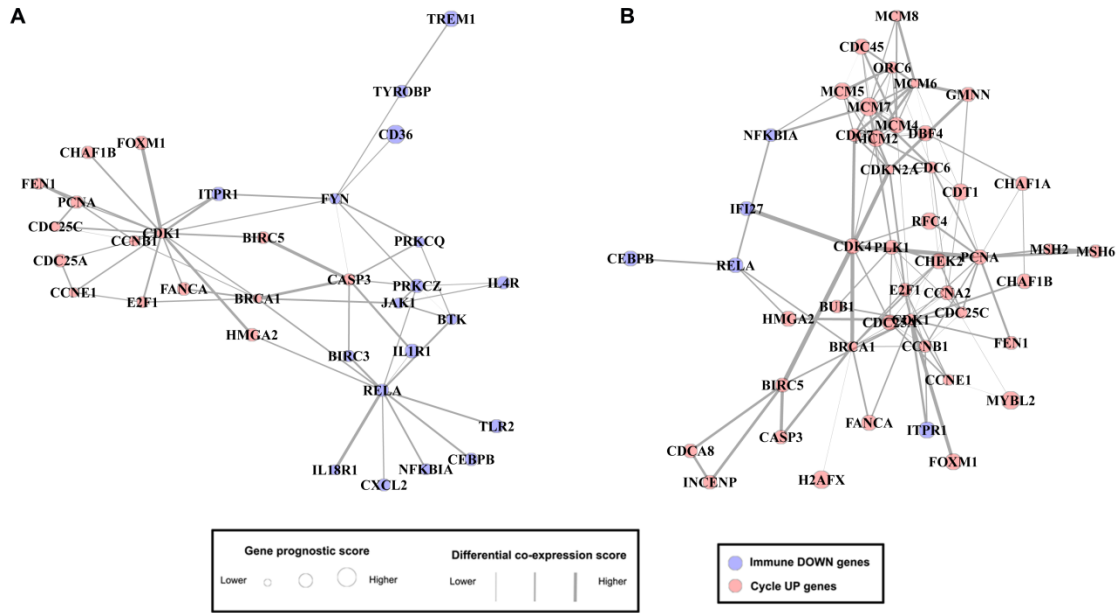

**Supplementary Figure 3:** The remaining two significant modules didn't perform well in testing cohorts.

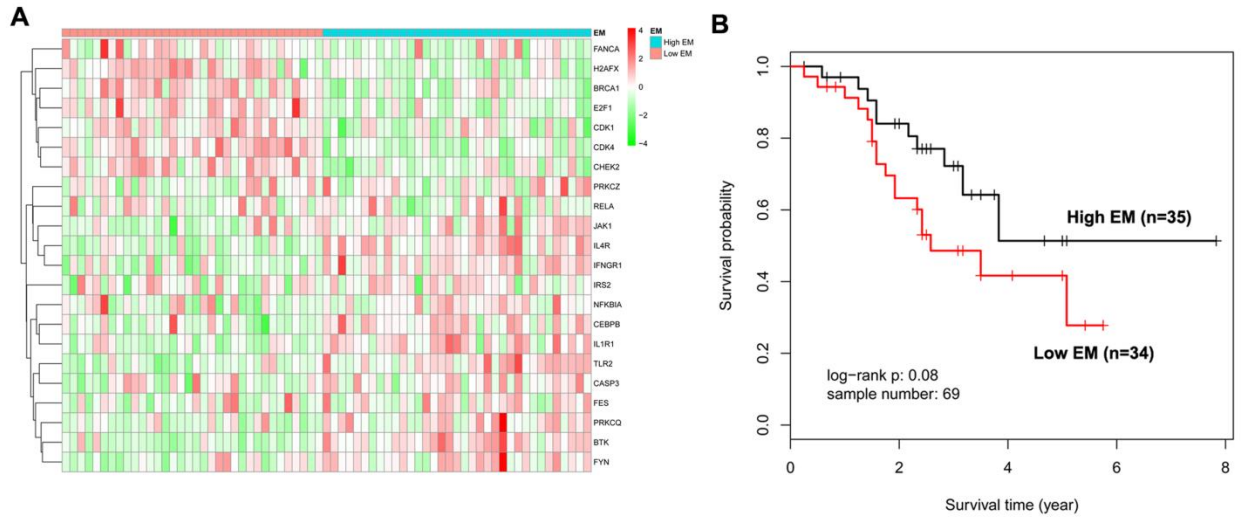

**Supplementary Figure 4:** Survival analysis of the significant 22-gene module in training cohort. **A.** The heatmap of these 22 genes in training data. Rows represent 22 module genes, while columns represent samples, which are divided into two groups according to their corresponding EM value. **B.** Kaplan–Meier survival analysis of these 22 genes in training data, of which the patients are divided into two EM-assigned groups.

Supplementary Table 1: GO analysis of 1025 consistent downregulated DEGs using DAVID

Supplementary Table 2: GO analysis of 1376 consistent downregulated DEGs using DAVID

Supplementary Table 3: KEGG pathways associated with these 22 genes by gene annotation enrichment analysis using DAVID

| Term                                                                | Count | %      | Pvalue | Enrichment | FDR   |
|---------------------------------------------------------------------|-------|--------|--------|------------|-------|
| hsa04660:T cell receptor signaling pathway                          | 5     | 22.727 | 0.001  | 11.771     | 0.006 |
| hsa04920:Adipocytokine signaling pathway                            | 4     | 18.182 | 0.002  | 15.179     | 0.018 |
| hsa04115:p53 signaling pathway                                      | 4     | 18.182 | 0.002  | 14.956     | 0.018 |
| hsa05212:Pancreatic cancer                                          | 4     | 18.182 | 0.002  | 14.125     | 0.022 |
| hsa05220:Chronic myeloid leukemia                                   | 4     | 18.182 | 0.003  | 13.560     | 0.024 |
| hsa05222:Small cell lung cancer                                     | 4     | 18.182 | 0.003  | 12.107     | 0.033 |
| hsa04210:Apoptosis                                                  | 4     | 18.182 | 0.004  | 11.690     | 0.037 |
| hsa05200:Pathways in cancer                                         | 6     | 27.273 | 0.006  | 4.651      | 0.056 |
| hsa04110:Cell cycle                                                 | 4     | 18.182 | 0.011  | 8.136      | 0.098 |
| hsa05120:Epithelial cell signaling in Helicobacter pylori infection | 3     | 13.636 | 0.026  | 11.217     | 0.226 |
| hsa04662:B cell receptor signaling pathway                          | 3     | 13.636 | 0.031  | 10.170     | 0.265 |
| hsa05215:Prostate cancer                                            | 3     | 13.636 | 0.043  | 8.570      | 0.346 |
| hsa04620:Toll-like receptor signaling pathway                       | 3     | 13.636 | 0.054  | 7.552      | 0.415 |
| hsa04722:Neurotrophin signaling pathway                             | 3     | 13.636 | 0.077  | 6.151      | 0.541 |
| hsa04650:Natural killer cell mediated cytotoxicity                  | 3     | 13.636 | 0.087  | 5.735      | 0.587 |
| hsa04530:Tight junction                                             | 3     | 13.636 | 0.088  | 5.692      | 0.592 |
| hsa04630:Jak-STAT signaling pathway                                 | 3     | 13.636 | 0.113  | 4.921      | 0.687 |
| hsa05219:Bladder cancer                                             | 2     | 9.091  | 0.146  | 12.107     | 0.784 |
| hsa04062:Chemokine signaling pathway                                | 3     | 13.636 | 0.153  | 4.079      | 0.801 |
| hsa04930:Type II diabetes mellitus                                  | 2     | 9.091  | 0.162  | 10.819     | 0.820 |
| hsa05223:Non-small cell lung cancer                                 | 2     | 9.091  | 0.184  | 9.417      | 0.861 |
| hsa04623:Cytosolic DNA-sensing pathway                              | 2     | 9.091  | 0.187  | 9.245      | 0.866 |
| hsa04621:NOD-like receptor signaling pathway                        | 2     | 9.091  | 0.208  | 8.202      | 0.897 |
| hsa05214:Glioma                                                     | 2     | 9.091  | 0.211  | 8.071      | 0.900 |
| hsa04622:RIG-I-like receptor signaling pathway                      | 2     | 9.091  | 0.235  | 7.162      | 0.926 |
| hsa05218:Melanoma                                                   | 2     | 9.091  | 0.235  | 7.162      | 0.926 |
| hsa05416:Viral myocarditis                                          | 2     | 9.091  | 0.235  | 7.162      | 0.926 |
| hsa04664:Fc epsilon RI signaling pathway                            | 2     | 9.091  | 0.255  | 6.519      | 0.943 |
| hsa04060:Cytokine-cytokine receptor interaction                     | 3     | 13.636 | 0.256  | 2.911      | 0.944 |
| hsa04010:MAPK signaling pathway                                     | 3     | 13.636 | 0.263  | 2.857      | 0.949 |
| hsa04640:Hematopoietic cell lineage                                 | 2     | 9.091  | 0.277  | 5.913      | 0.957 |
| hsa04360:Axon guidance                                              | 2     | 9.091  | 0.387  | 3.942      | 0.991 |
| hsa04910:Insulin signaling pathway                                  | 2     | 9.091  | 0.401  | 3.767      | 0.993 |

**Supplementary Table 4: Gene scores of the 22 genes in the significant module with JAK1 as the seed.**

| <b>Gene symbol</b> | <b>Entrez identifier</b> | <b>Gene score</b> |
|--------------------|--------------------------|-------------------|
| <b>JAK1</b>        | <b>3716</b>              | <b>-0.310</b>     |
| <b>PRKCZ</b>       | <b>5590</b>              | <b>1.518</b>      |
| <b>IL4R</b>        | <b>3566</b>              | <b>0.967</b>      |
| <b>IRS2</b>        | <b>8660</b>              | <b>1.347</b>      |
| <b>FES</b>         | <b>2242</b>              | <b>0.889</b>      |
| <b>RELA</b>        | <b>5970</b>              | <b>0.963</b>      |
| <b>TLR2</b>        | <b>7097</b>              | <b>1.455</b>      |
| <b>CEBPB</b>       | <b>1051</b>              | <b>1.092</b>      |
| <b>BTK</b>         | <b>695</b>               | <b>-0.028</b>     |
| <b>IL1R1</b>       | <b>3554</b>              | <b>1.903</b>      |
| <b>CASP3</b>       | <b>836</b>               | <b>0.460</b>      |
| <b>BRCA1</b>       | <b>672</b>               | <b>-1.080</b>     |
| <b>CDK4</b>        | <b>1019</b>              | <b>1.220</b>      |
| <b>CHEK2</b>       | <b>11200</b>             | <b>1.287</b>      |
| <b>FANCA</b>       | <b>2175</b>              | <b>1.250</b>      |
| <b>H2AFX</b>       | <b>3014</b>              | <b>2.296</b>      |
| <b>NFKBIA</b>      | <b>4792</b>              | <b>0.146</b>      |
| <b>CDK1</b>        | <b>983</b>               | <b>-0.357</b>     |
| <b>E2F1</b>        | <b>1869</b>              | <b>0.253</b>      |
| <b>PRKCQ</b>       | <b>5588</b>              | <b>-0.203</b>     |
| <b>FYN</b>         | <b>2534</b>              | <b>-0.053</b>     |
| <b>IFNGR1</b>      | <b>3459</b>              | <b>-0.531</b>     |

**Supplementary Table 5: Interaction score of all the edges in the significant 22-gene module with JAK1 as the seed.**

| <b>Interactor1</b> | <b>Interactor2</b> | <b>Interaction score</b> |
|--------------------|--------------------|--------------------------|
| JAK1               | PRKCZ              | 1.672                    |
| JAK1               | IL4R               | 1.216                    |
| JAK1               | IRS2               | 1.127                    |
| JAK1               | FES                | 1.107                    |
| JAK1               | BTK                | 1.645                    |
| JAK1               | BRCA1              | 1.946                    |
| JAK1               | IFNGR1             | 1.417                    |
| PRKCZ              | IL4R               | 0.901                    |
| PRKCZ              | IRS2               | 0.427                    |
| PRKCZ              | RELA               | 1.264                    |
| PRKCZ              | BTK                | 0.12                     |
| PRKCZ              | CASP3              | 1.378                    |
| PRKCZ              | FYN                | 1.451                    |
| IL4R               | IRS2               | 0.336                    |
| IL4R               | FES                | 0.354                    |
| IRS2               | FES                | 1.224                    |
| RELA               | TLR2               | 2.119                    |
| RELA               | CEBPB              | 2.183                    |
| RELA               | BTK                | 2.061                    |
| RELA               | IL1R1              | 0.504                    |
| RELA               | BRCA1              | 1.788                    |
| RELA               | NFKBIA             | 2.033                    |
| RELA               | IFNGR1             | 1.803                    |
| BTK                | PRKCQ              | 1.180                    |
| IL1R1              | CASP3              | 2.352                    |
| CASP3              | BRCA1              | 2.973                    |
| CASP3              | PRKCQ              | 1.725                    |
| CASP3              | FYN                | 0.236                    |

|              |              |              |
|--------------|--------------|--------------|
| <b>BRCA1</b> | <b>CDK4</b>  | <b>4.272</b> |
| <b>BRCA1</b> | <b>CHEK2</b> | <b>2.005</b> |
| <b>BRCA1</b> | <b>FANCA</b> | <b>1.966</b> |
| <b>BRCA1</b> | <b>H2AFX</b> | <b>0.250</b> |
| <b>BRCA1</b> | <b>CDK1</b>  | <b>1.423</b> |
| <b>BRCA1</b> | <b>E2F1</b>  | <b>1.535</b> |
| <b>CHEK2</b> | <b>E2F1</b>  | <b>0.602</b> |
| <b>FANCA</b> | <b>CDK1</b>  | <b>1.648</b> |
| <b>CDK1</b>  | <b>E2F1</b>  | <b>2.058</b> |
| <b>CDK1</b>  | <b>FYN</b>   | <b>1.340</b> |
| <b>PRKCQ</b> | <b>FYN</b>   | <b>1.815</b> |
